# Supplementary material
Source: Springer Nature journal article supplement (http://www.springermedizin.de/resource/supplementary/12955_2004_146_MOESM2_ESM.pdf/9559778)

2a)

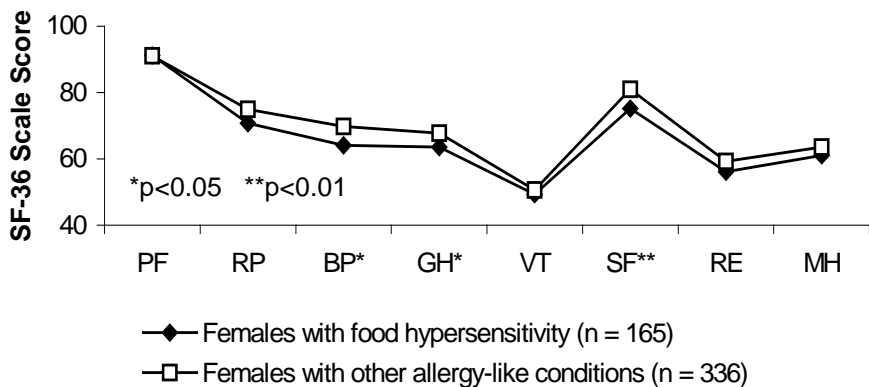

2b)

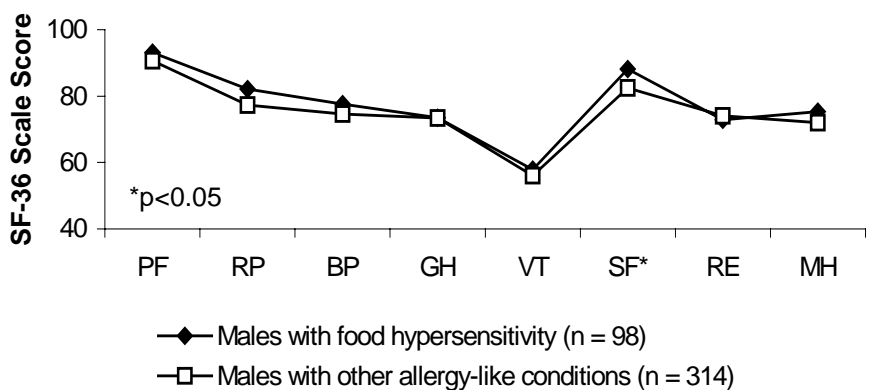

2c)

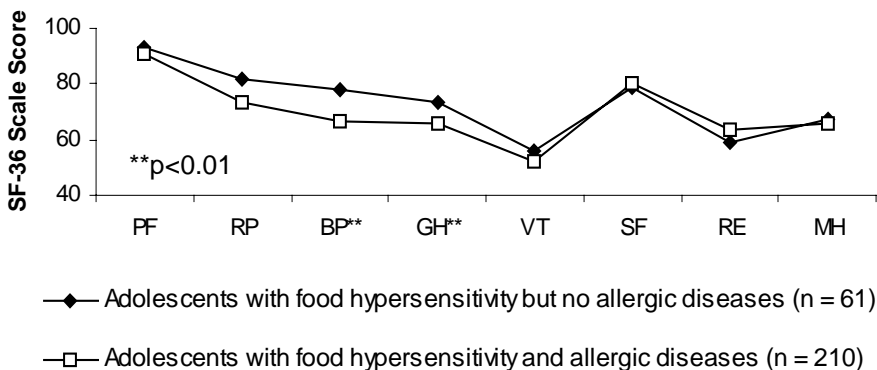

Supplement: MOESM2 [file 9559778]
